# Supplementary material for: Charge transport in nanoparticular thin films of zinc oxide and aluminum-doped zinc oxide
Source: Royal Society of Chemistry journal article supplement (doi:10.1039/c4tc01969e), 2014-12-22
Supplement: c4tc01969e1.pdf [file c4tc01969e1.pdf]

## SUPPORTING INFORMATION:

### Charge Transport in Nanoparticulate Thin Films of Zinc Oxide and Aluminum-doped Zinc Oxide

*Thomas Lenz, Moses Richter, Gebhard J. Matt, Norman A. Luechinger, Samuel C. Halim,*

*Wolfgang Heiss, and Christoph J. Brabec*

Further experimental details:

Substrates with ITO on glass were received from Weidner Glas GmbH. Structuring of the back contacts was achieved by laser ablation. The substrates were cleaned in ultrasonic bath of both acetone and 2-propanol each for at least 10 minutes. Then, the nanoparticulate dispersions were deposited onto the substrate via doctor blading. In order to achieve film thicknesses in the range of 1  $\mu\text{m}$ , the blading step was repeated several times each time followed by short annealing at 80°C for one minute. Final annealing was at 80°C for 10 minutes. The annealing as well as the blading were performed under ambient condition in a Class ISO 3 clean-room. Film thicknesses were measured with a KLA Tencor D-100 and were  $740 \pm 21$  nm and  $950 \pm 28$  nm for ZnO and AZO, respectively. Silver as top contact ( $\sim 100$  nm) was thermally evaporated through shadow masks in vacuum ( $8 \cdot 10^{-6}$  mbar) with a deposition rate of  $0.5 - 3$  Å/s. The resulting device cross section was  $0.1$  cm<sup>2</sup>.

The samples were electrically characterized in a N<sub>2</sub>-cryostat using a Keithley 236 Source Measurement Unit in the temperature range of 170 – 300 K (steps of 10 K).

The high resolution transmission electron microscopy phase contrast images were obtained with a JEOL 2011 FasTEM transmission electron microscope, operated at an acceleration voltage of 200 kV.

### Additional results and Figures

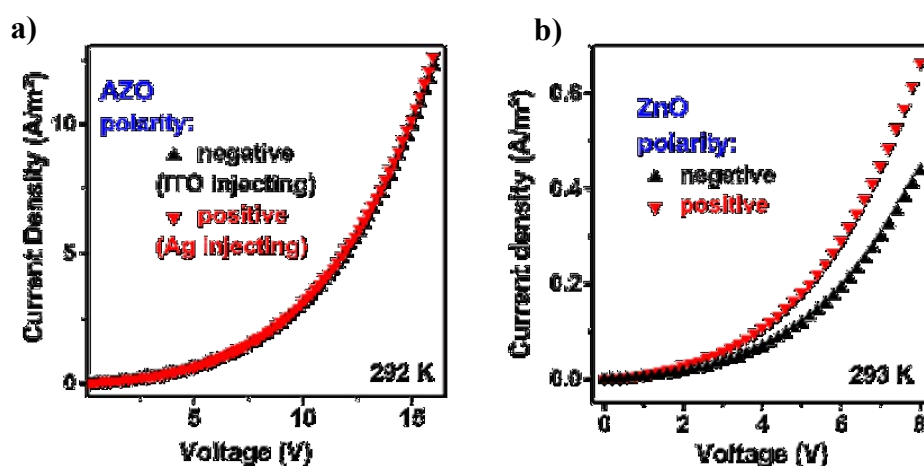

**Figure S1: a)** Current density-voltage (J-V) characteristic of AZO at 292 K for positive and negative polarity. For the latter, the absolute value of current density was plotted versus the absolute value of voltage, so that a comparison of the two polarities is possible. The two curves lie on one another confirming the symmetry of the characteristic.

**b)** Current density-voltage (J-V) characteristic of ZnO at 293 K for positive and negative polarity. The symmetry for ZnO is a bit worse compared to AZO, electron injection from Ag works a bit more efficient than electron injection from ITO. But the general curve progression is very similar for both. This confirms the bulk-limited charge transport character, as it is the case for AZO.

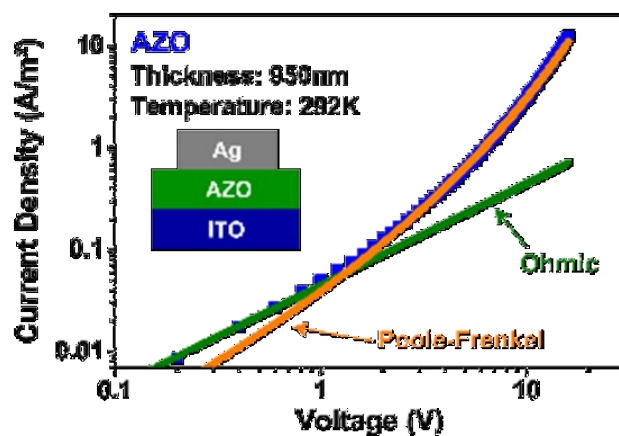

**Figure S2: a)** J-V characteristics of AZO in a double-logarithmic plot. Two fit functions demonstrate that the low voltage data is nicely described by Ohmic behavior, while the high voltage data follows Poole-Frenkel effect. This could be further demonstrated when plotting the data according to Equation 3 (see Manuscript).

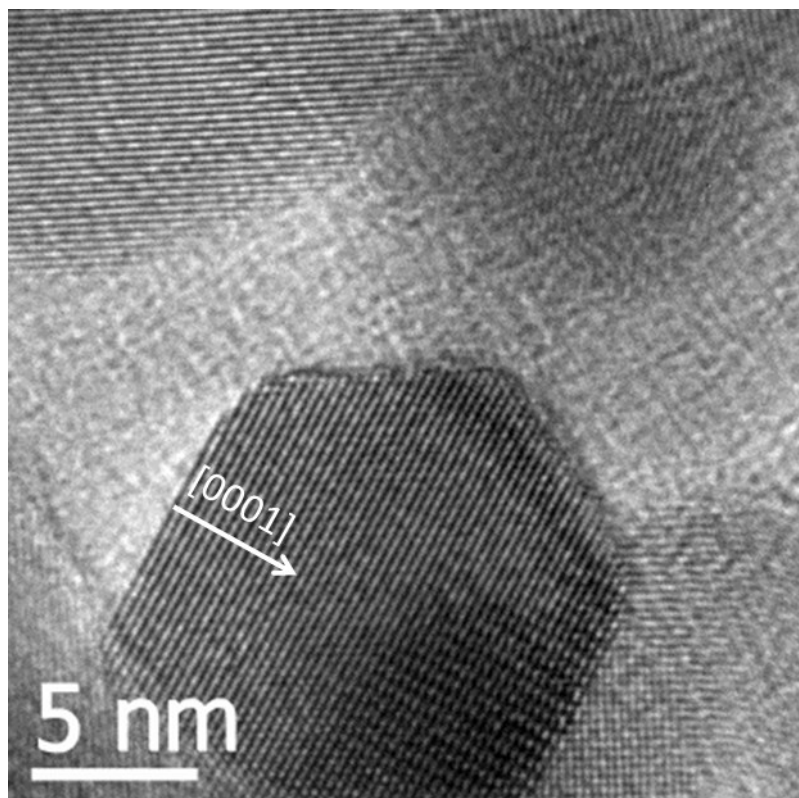

**Figure S3:** TEM picture of the AZO nanoparticles. As additional information we inserted the [0001] orientation into the picture. The spacing here is roughly 0.28 nm/fringe.

**Table S1:** Slopes and y-intercepts of the linear regimes in the Poole-Frenkel plot of AZO and the resulting experimental values of  $\beta$ .

| <b>AZO (950 nm)</b>    |                                              |                                                            |                                  |
|------------------------|----------------------------------------------|------------------------------------------------------------|----------------------------------|
| <b>Temperature [K]</b> | <b>Slope [<math>m^{0.5} V^{-0.5}</math>]</b> | <b><math>\beta</math> [<math>eVm^{0.5}V^{-0.5}</math>]</b> | <b><math>\ln \sigma_0</math></b> |
| 194                    | 0.00135                                      | $2.25 \cdot 10^{-5}$                                       | -25.69803                        |
| 200                    | 0.00131                                      | $2.25 \cdot 10^{-5}$                                       | -25.37809                        |
| 212                    | 0.00127                                      | $2.32 \cdot 10^{-5}$                                       | -25.06758                        |
| 223                    | 0.00123                                      | $2.36 \cdot 10^{-5}$                                       | -24.76875                        |
| 234                    | 0.00119                                      | $2.40 \cdot 10^{-5}$                                       | -24.47576                        |
| 245                    | 0.00116                                      | $2.45 \cdot 10^{-5}$                                       | -24.1819                         |
| 251                    | 0.00114                                      | $2.47 \cdot 10^{-5}$                                       | -24.01716                        |
| 263                    | 0.0011                                       | $2.49 \cdot 10^{-5}$                                       | -23.69447                        |
| 274                    | 0.00107                                      | $2.53 \cdot 10^{-5}$                                       | -23.41668                        |
| 285                    | 0.00104                                      | $2.55 \cdot 10^{-5}$                                       | -23.09004                        |
| 298                    | 0.001                                        | $2.56 \cdot 10^{-5}$                                       | -22.78357                        |

**Table S2:** Slopes and y-intercepts of the linear regimes in the Poole-Frenkel plot of ZnO and the resulting experimental values of  $\beta$ .

| <b>ZnO (740 nm)</b>    |                                                            |                                                                          |                                  |
|------------------------|------------------------------------------------------------|--------------------------------------------------------------------------|----------------------------------|
| <b>Temperature [K]</b> | <b>Slope [<math>\text{m}^{0.5} \text{V}^{-0.5}</math>]</b> | <b><math>\beta</math> [<math>\text{eVm}^{0.5}\text{V}^{-0.5}</math>]</b> | <b><math>\ln \sigma_0</math></b> |
| 189                    | 0.00168                                                    | $2.74 \cdot 10^{-5}$                                                     | -31.37495                        |
| 200                    | 0.00154                                                    | $2.65 \cdot 10^{-5}$                                                     | -30.39842                        |
| 211                    | 0.00146                                                    | $2.65 \cdot 10^{-5}$                                                     | -29.58766                        |
| 222                    | 0.00139                                                    | $2.66 \cdot 10^{-5}$                                                     | -28.78824                        |
| 232                    | 0.00132                                                    | $2.64 \cdot 10^{-5}$                                                     | -27.9833                         |
| 242                    | 0.00125                                                    | $2.61 \cdot 10^{-5}$                                                     | -27.15632                        |
| 253                    | 0.00119                                                    | $2.59 \cdot 10^{-5}$                                                     | -26.35663                        |
| 263                    | 0.00113                                                    | $2.56 \cdot 10^{-5}$                                                     | -25.61871                        |
| 273                    | 0.0011                                                     | $2.59 \cdot 10^{-5}$                                                     | -24.98272                        |
| 283                    | 0.00108                                                    | $2.63 \cdot 10^{-5}$                                                     | -24.54576                        |
| 293                    | 0.00109                                                    | $2.75 \cdot 10^{-5}$                                                     | -24.54866                        |
